# Supplementary material for: Monodisperse Cu/Cu2O@C core–shell nanocomposite supported on rGO layers as an efficient catalyst derived from a Cu-based MOF/GO structure
Source: Royal Society of Chemistry journal article supplement (doi:10.1039/c8nr04475a), 2018-01-01
Supplement: c8nr04475a1.pdf [file c8nr04475a1.pdf]

## Supplementary materials

### Monodisperse Cu/Cu<sub>2</sub>O@C Core-Shell Nanocomposite Supported on rGO Layers as An Efficient Catalyst Derived from Cu-Based MOFs/GO Structure

Ke YANG,<sup>\*a†</sup> Yu YAN,<sup>a†</sup> Haiyang WANG,<sup>a</sup> Zhixuan SUN,<sup>a</sup> Wen CHEN,<sup>a</sup> Hongtao KANG,<sup>a</sup> Yi HAN,<sup>a</sup> Wenquan ZAHNG,<sup>a</sup> Xiaohua SUN,<sup>a</sup> and Zhenxing LI<sup>\*a</sup>

*a* State Key Laboratory of Heavy Oil Processing, Institute of New Energy, China University of Petroleum-Beijing, Beijing, 102249, P. R. China.

*†* These authors contributed equally.

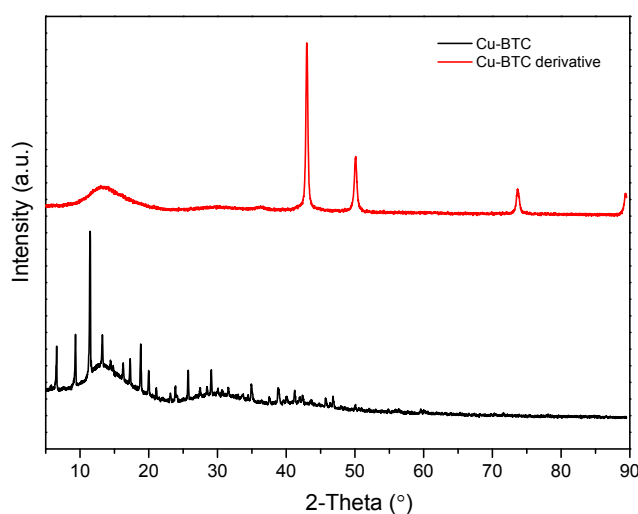

**Figure 1s** The XRD pattern of Cu-BTC and Cu-BTC derivative.

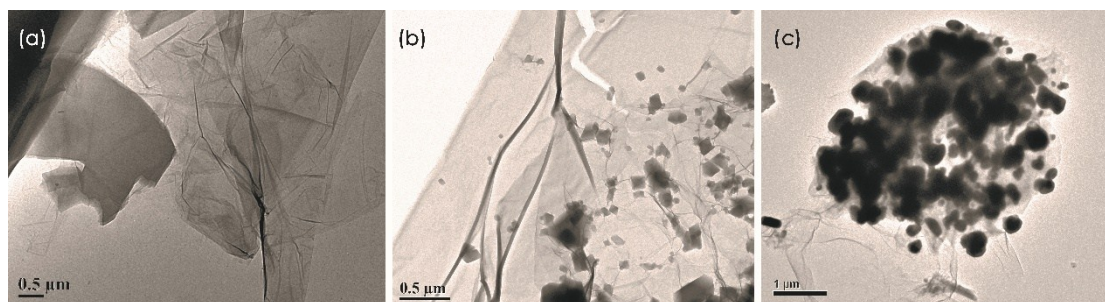

**Figure 2s** TEM images of (a) GO sheets, (b) Cu-BTC/GO and Cu-BTC derivative under N<sub>2</sub> atmosphere.

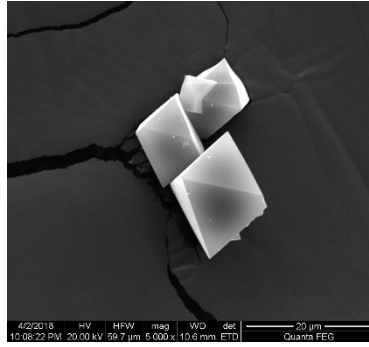

**Figure 3s** SEM image of virgin Cu-BTC crystal.

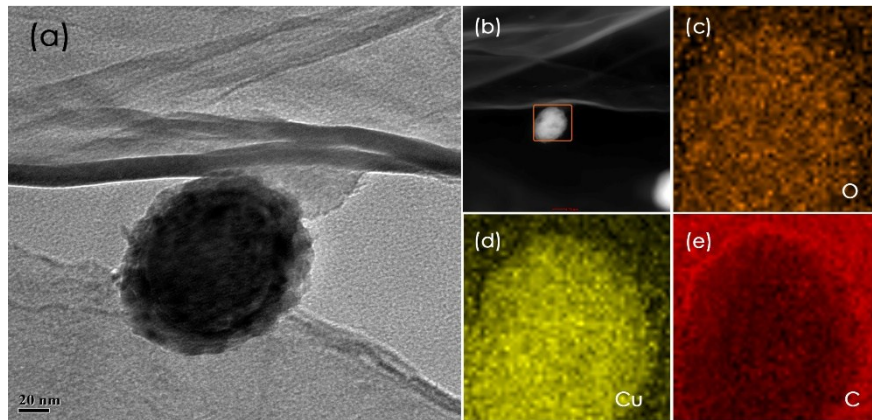

**Figure 4s** TEM (a), HAADF (b) and EDS mapping (c-d) images of Cu/Cu<sub>2</sub>O@C-rGO composite

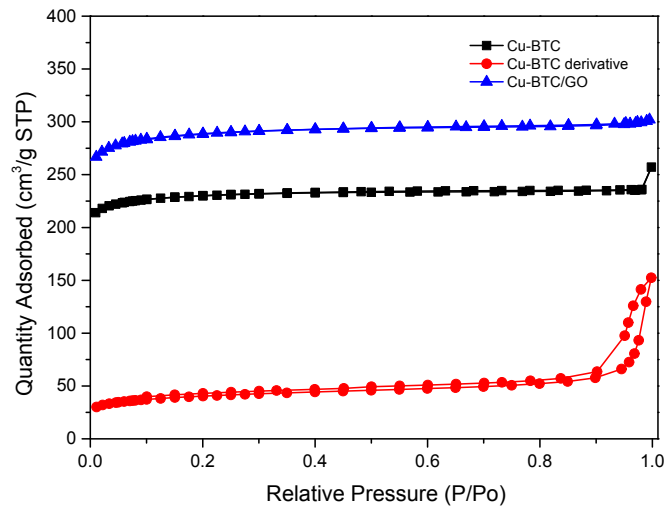

**Figure 5s** N<sub>2</sub> adsorption-desorption isotherm of Cu-BTC, Cu-BTC/GO and Cu-BTC derivative.

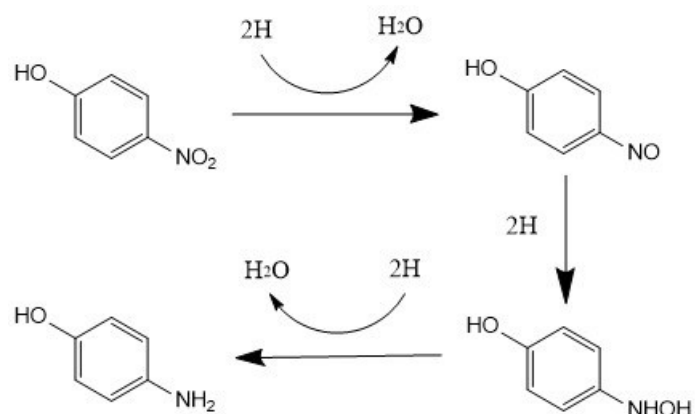

**Figure 6s** The three sequential steps of 4-NP to 4-AP.

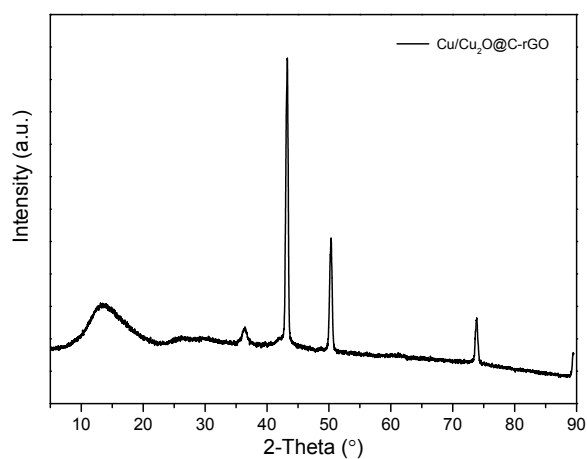

**Figure 7s** The XRD pattern of Cu/Cu<sub>2</sub>O@C-rGO composite that exposed to the air for more than a month.

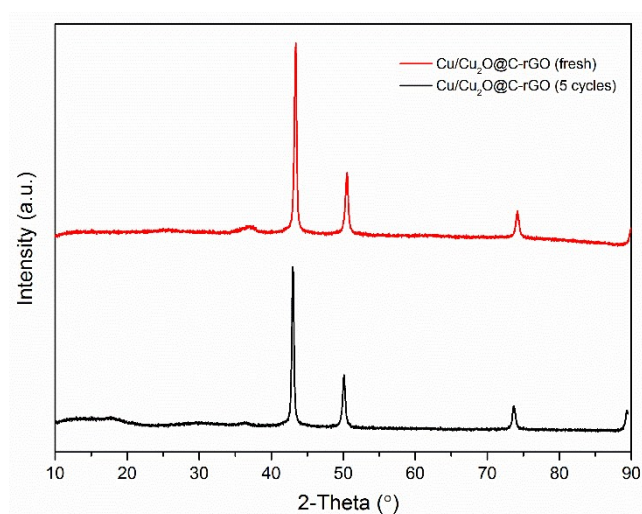

**Figure 8s** The XRD pattern of Cu/Cu<sub>2</sub>O@C-rGO composite before (red) and after (black) 5 cycles catalytic reaction test.

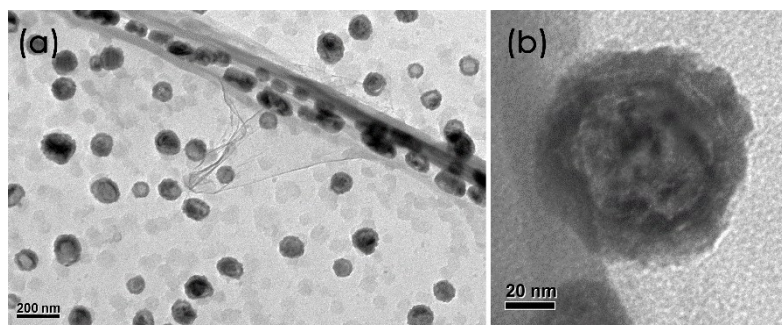

**Figure 9s** TEM (a and b) images of Cu/Cu<sub>2</sub>O@C-rGO composite after five cycling catalytic reaction test.

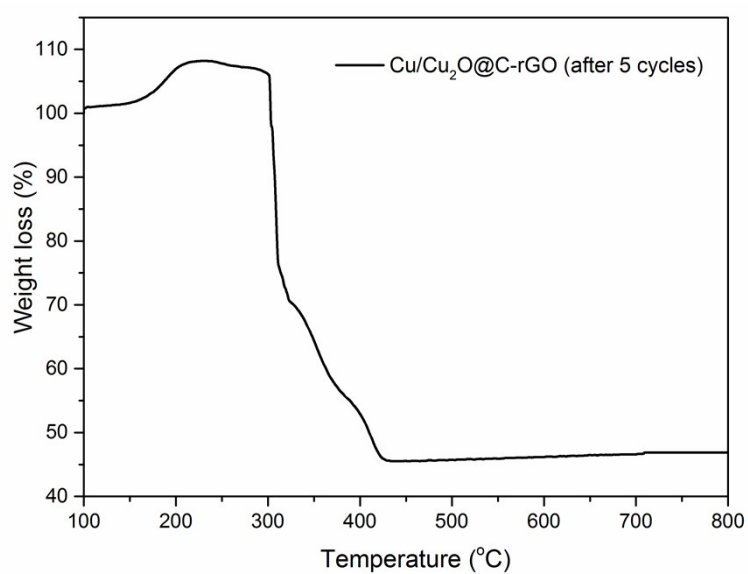

**Figure 10s** The TG curve of Cu/Cu<sub>2</sub>O@C-rGO composite after five cycling catalytic reaction test.
